# Supplementary material for: Functional characterization of SMARCA4 variants identified by targeted exome-sequencing of 131,668 cancer patients
Source: PubMed Central journal article supplement (PMC7609548; doi:10.1038/s41467-020-19402-8), 2020-11-03
Supplement: 41467_2020_19402_MOESM1_ESM.pdf [file 41467_2020_19402_MOESM1_ESM.pdf]

## **Supplementary Information**

Functional characterization of *SMARCA4* variants identified by targeted exome-sequencing of 131,668 cancer patients

Fernando et al.

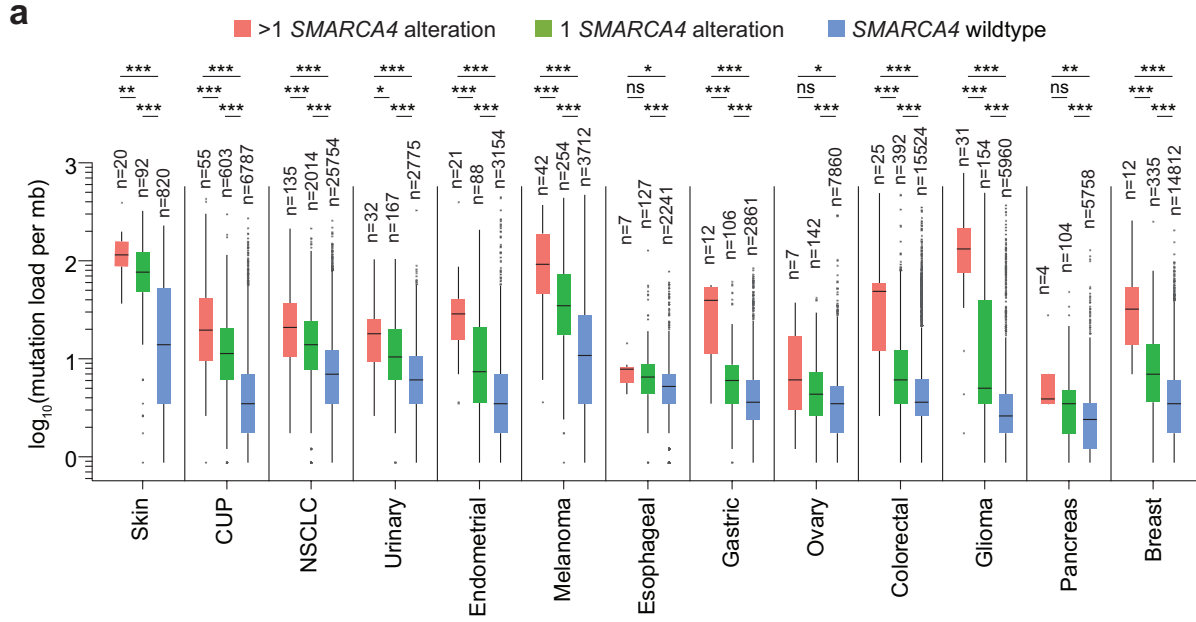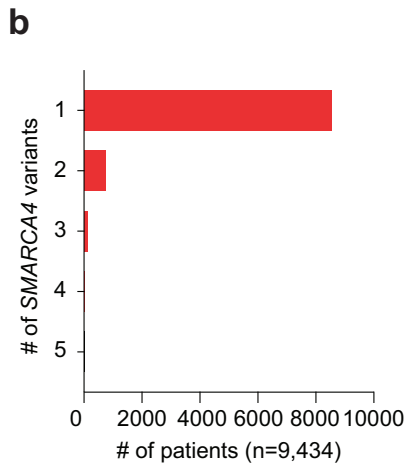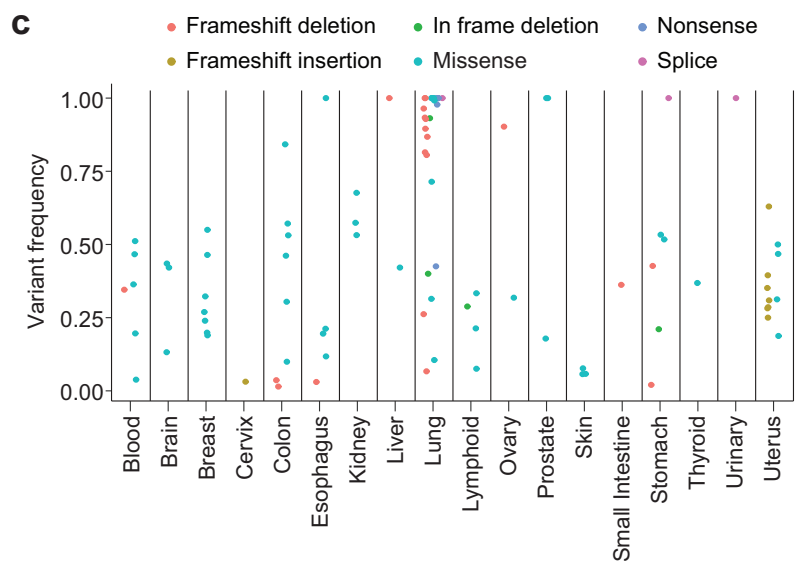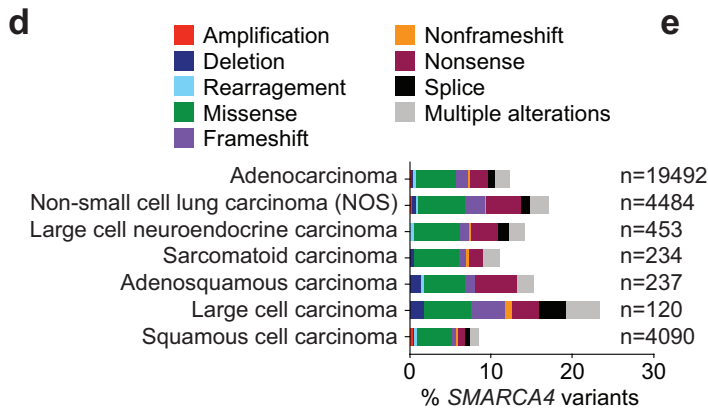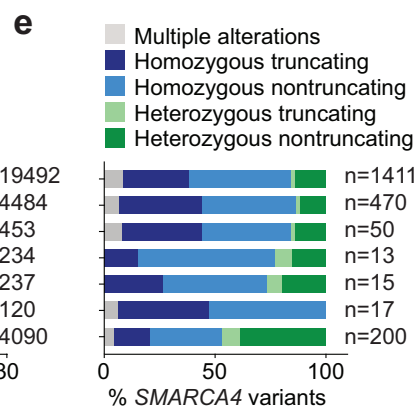

### **Supplementary Figure 1. Tumor mutation burden and variant distribution of *SMARCA4* mutant cancers**

- a) Tumor mutation burden of patients with one or multiple alterations in *SMARCA4* relative to *SMARCA4* wildtype patients. The number of patients in each disease group with >1, 1 *SMARCA4* alteration or *SMARCA4* wildtype are indicated. First and third quartiles are represented by the lower and upper hinges with the median represented by the line within the box; whiskers extend to 1.5 x the interquartile range. Outliers are represented as individual points. Significance was tested with a two-tailed Wilcoxon rank-sum test (\*  $P<0.05$ ; \*\*  $P<0.01$ ; \*\*\*  $P<0.001$ ). Number of patients per group are indicated.
- b) Number of *SMARCA4* variants per patient tumor.
- c) Variation frequency of *SMARCA4* mutations in a panel of *SMARCA4* mutant cancer cell lines (n=98 cell lines).
- d) Alteration frequency of *SMARCA4* in NSCLC subtypes. The number of patients in each NSCLC subtype assessed are indicated.
- e) Zygosity of *SMARCA4* truncating and nontruncating variants in NSCLC subtype.

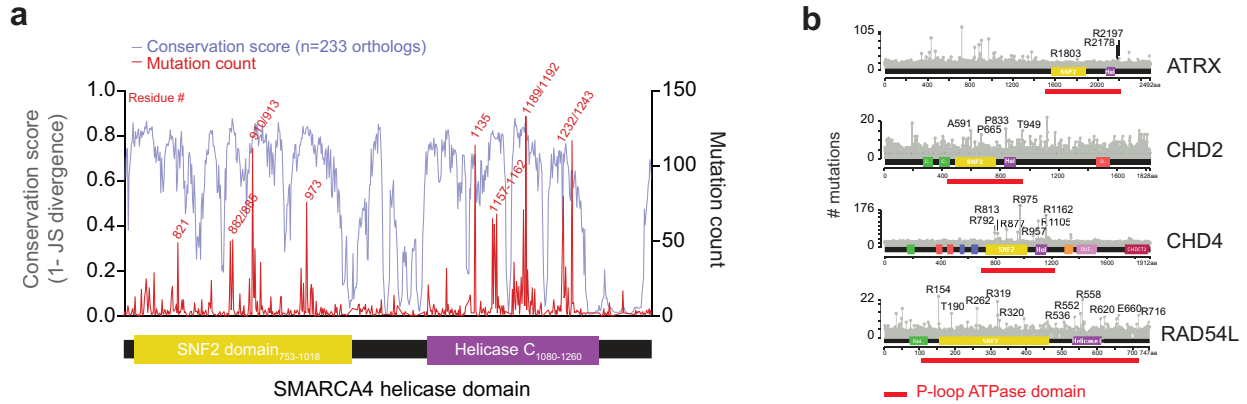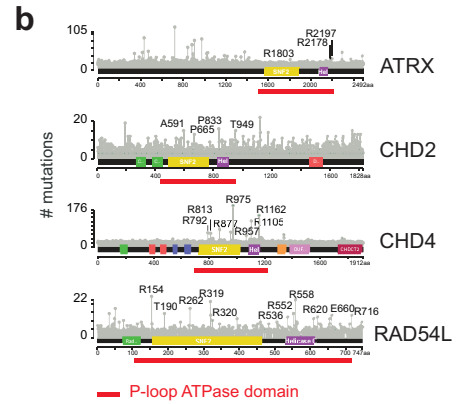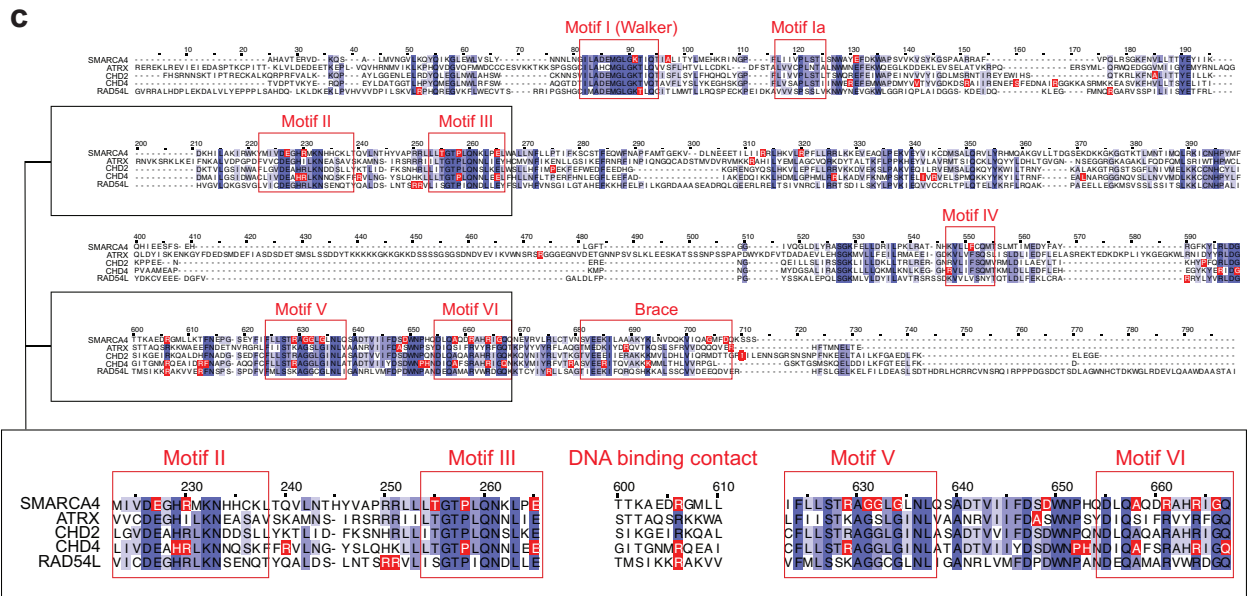

**d**

| Residue | Count (n) | Domain               |
|---------|-----------|----------------------|
| R1192   | 133       | Helicase C-terminal  |
| R1243   | 117       | Helicase C-terminal  |
| R1135   | 114       | Helicase C-terminal  |
| T910    | 112       | Helicase ATP-binding |
| G1232   | 80        | Helicase C-terminal  |
| R973    | 76        | Helicase hinge       |
| R1189   | 71        | Helicase C-terminal  |
| G1162   | 68        | Helicase C-terminal  |
| R1157   | 65        | Helicase C-terminal  |
| G1159   | 61        | Helicase C-terminal  |
| R885    | 51        | Helicase hinge       |
| E882    | 50        | Helicase ATP-binding |
| E821    | 49        | Helicase ATP-binding |
| P913    | 45        | Helicase ATP-binding |
| G1160   | 43        | Helicase C-terminal  |
| D1177   | 36        | Helicase C-terminal  |
| E920    | 36        | Helicase ATP-binding |
| D1235   | 33        | Helicase C-terminal  |
| F1102   | 32        | Helicase C-terminal  |
| R966    | 32        | Helicase ATP-binding |
| G1194   | 31        | Helicase C-terminal  |
| A791    | 29        | Helicase ATP-binding |
| A1186   | 26        | Helicase C-terminal  |
| R979    | 21        | Helicase hinge       |
| K785R   | -         | ATPase dead, control |

## **Supplementary Figure 2. Conservation and characterization of SMARCA4 mutations**

- a) Conservation and mutation count of SMARCA4 missense mutations. Sequence conservation is represented as 1-the Jensen-Shannon (JS) divergence using a 3-residue averaging window.
- b) Lollipop plots of hotspot missense mutations of SNF2 family members profiled in the FoundationOne<sup>®</sup> panel (ATRX, CHD2, CHD4 and RAD54L) (n=131,668 patients).
- c) ClustalW alignment of SMARCA4 and other SNF2 family members from (b). Residues in red signify where missense mutations occur. SNF2 members profiled in the FoundationOne<sup>®</sup> panel were used due to the cohort size (n=131,668), which allows for the identification of more missense mutations.
- d) Table of frequently mutated residues of SMARCA4 protein. Mutations in red signify those chosen for functional validation. The ATPase dead K785R mutation was included as a control.

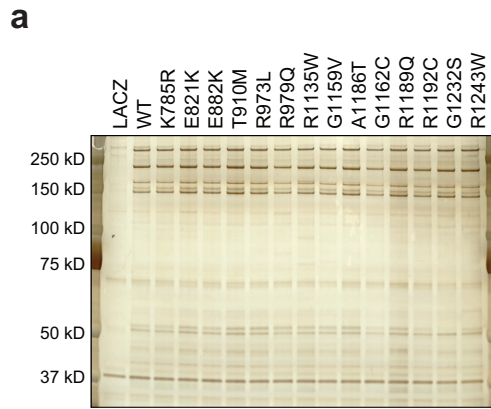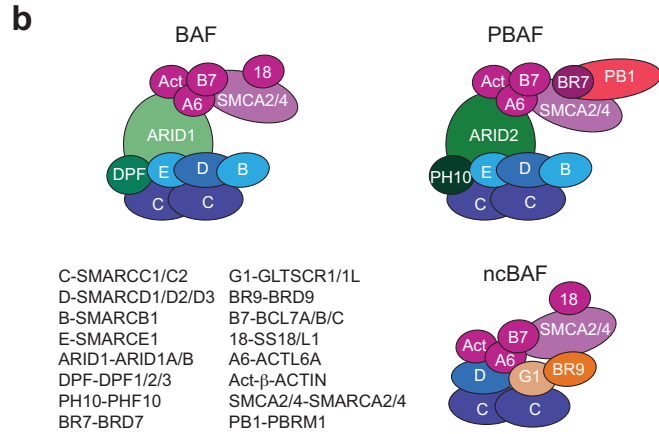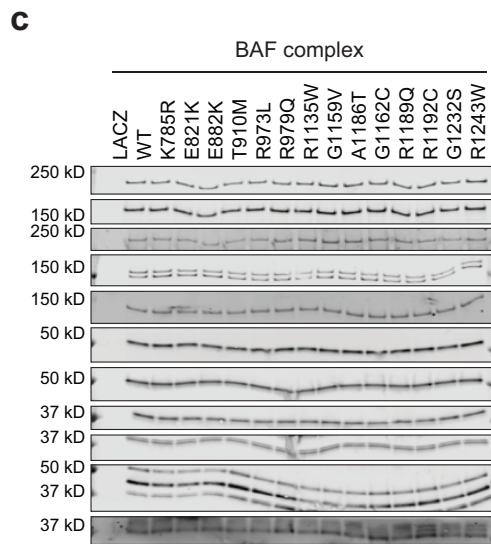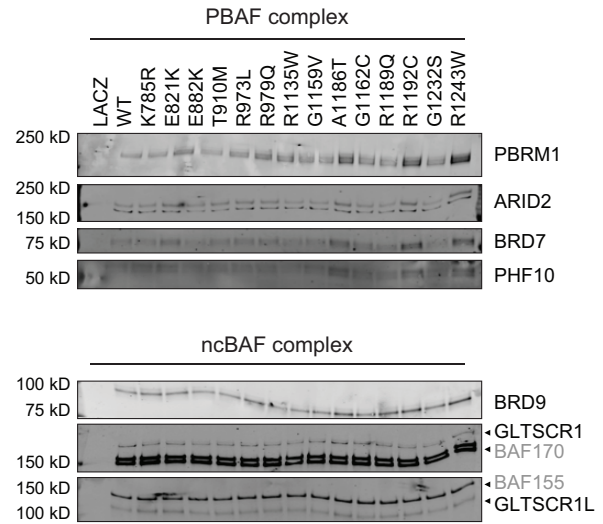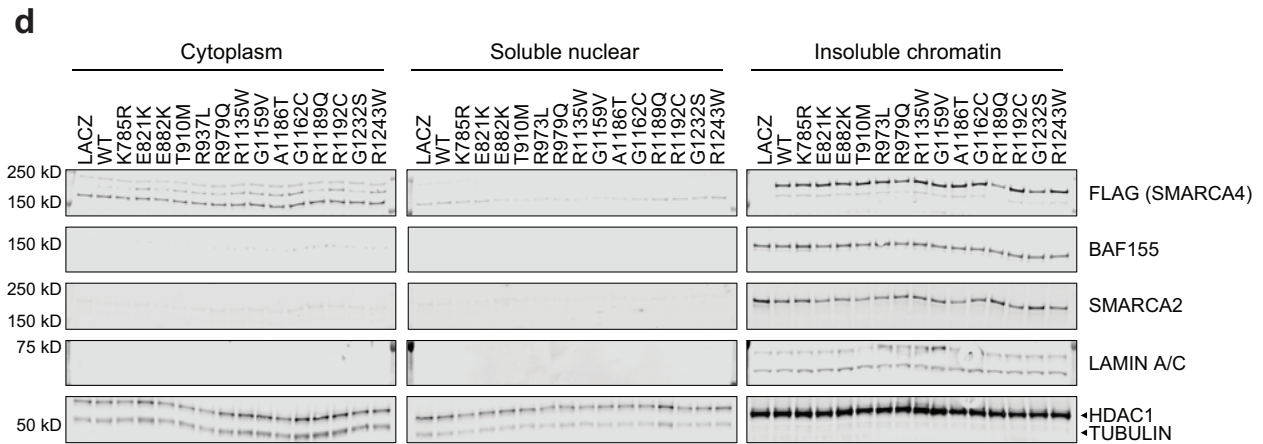

**Supplementary Figure 3. SMARCA4 mutants do not affect BAF complex formation or localization**

- a) Silver staining of SMARCA4 FLAG immunoprecipitations from 293T cells transduced with SMARCA4 WT or mutants (representative of at least 2 replicates).
  - b) Composition of BAF, PBAF and ncBAF members.
  - c) Immunoblot of SMARCA4 FLAG immunoprecipitations for BAF, PBAF and ncBAF members in cells from (a) (representative of 3 replicates).
  - d) Immunoblot of cytoplasmic, nuclear and chromatin compartments of 293T transduced with SMARCA4 WT or mutants (representative of 2 replicates).
- Source data are provided as a Source Data file.

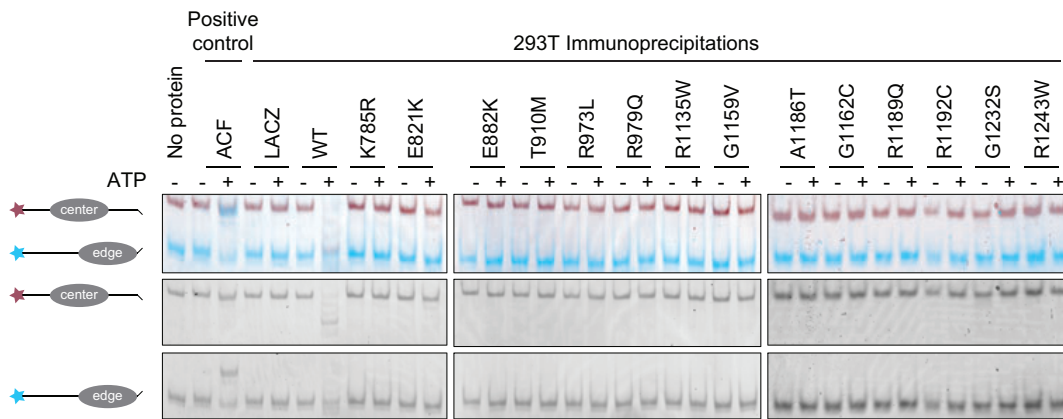

**Supplementary Figure 4. SMARCA4 mutants cannot slide edge- or center-positioned nucleosomes**

Gel shift assay of center- and edge-positioned nucleosomes with immunopurified SMARCA4 WT and mutants from 293T cells. Recombinant ACF is used for a positive control and only remodels edge-positioned nucleosomes. This experiment is representative of two replicates with the same result. Source data are provided as a Source Data file.



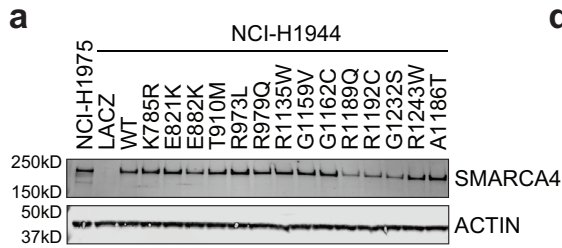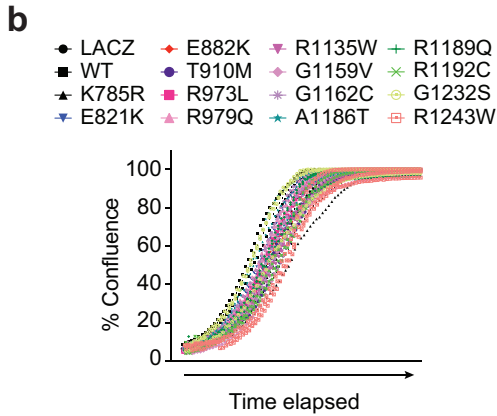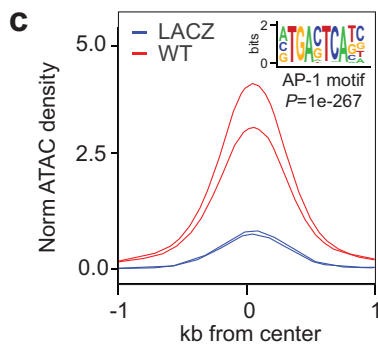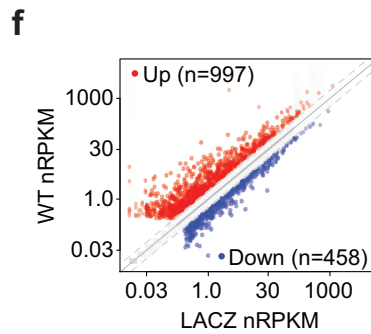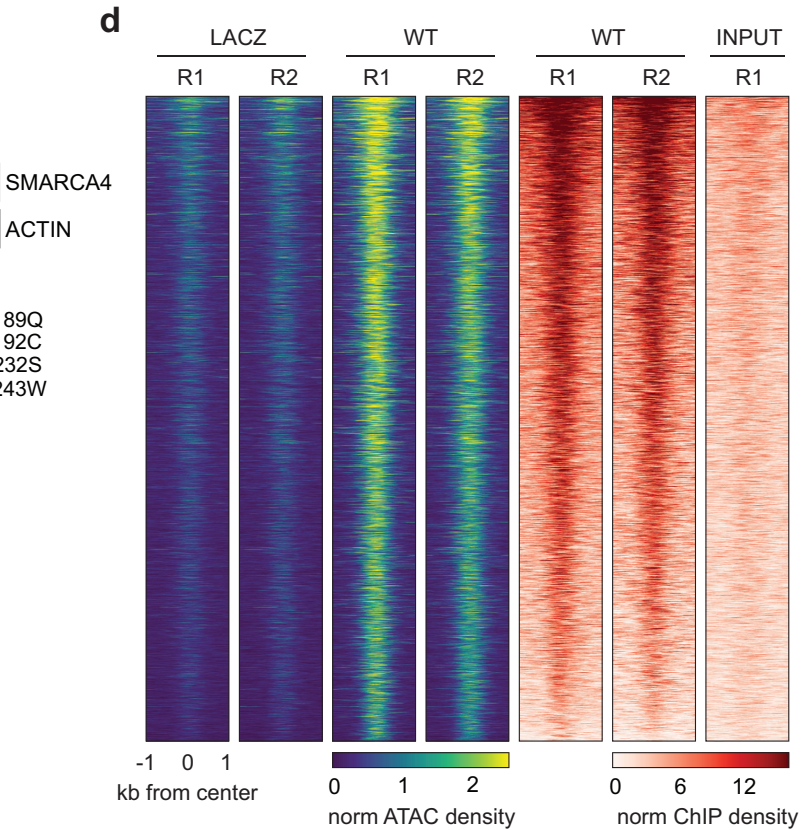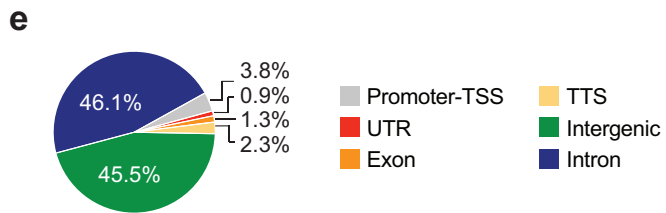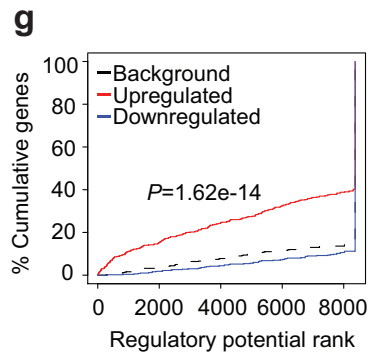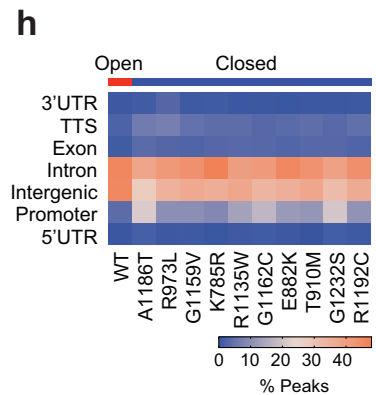

## **Supplementary Figure 5. SMARCA4 WT induces large increases in chromatin accessibility and gene expression**

- a) Immunoblot of NCI-H1944 cells transduced with SMARCA4 WT or mutants (representative of 3 replicates).
- b) Growth rates of cells from (b) over the course of 10 days (n=2 technical replicates; representative of 3 independent experiments).
- c) Normalized ATAC-seq read density of NCI-H1944 cells transduced with LACZ or SMARCA4 WT. Each line represents a replicate (n=2). AP-1 was the most significantly enriched motif identified by HOMER in regions opened by SMARCA4 WT using a hypergeometric test (one-tailed).
- d) Heatmap of accessibility (ATAC-seq) and SMARCA4 occupancy by ChIP-seq at regions with increased accessibility in LACZ or WT cells from (a). Data are shown for each replicate (R) as normalized peak counts per million genomic DNA fragments (n=2). Rows are rank ordered by ATAC-seq peaks in WT.
- e) Genomic distribution of chromatin accessible sites gained after SMARCA4 re-expression in cells from (a).
- f) Scatter plot of gene expression changes in NCI-H1944 cells expressing LACZ or SMARCA4 WT. Significance was tested with a moderated t-statistic (two-sided) and *P* values were adjusted for multiple testing with the Benjamini–Hochberg procedure ( $\log_2$  fold-change>1, adjusted *P*<0.05; n=3 per group). Gene expression was obtained in the form of normalized Reads Per Kilobase gene model per Million total reads (nRPKM).
- g) BETA analysis graphs depicting the effect of differentially open ATAC sites in cells from (f). Genes were ranked from high to low according to the regulatory potential of the corresponding chromatin peak. Purple lines represent WT-downregulated genes while red lines represent WT-upregulated genes. A one-tailed Kolmogorov–Smirnov test was used to determine whether the up and downregulated groups differed significantly from the static group of transcriptionally unchanged genes (dashed lines).
- h) Genomic distribution of ATAC sites opened after SMARCA4 WT (red bar) or closed after SMARCA4 mutant expression (blue bar) in cells from (a). Source data are provided as a Source Data file.

**a**

|                  |  |                        |
|------------------|--|------------------------|
| Mut closed sites |  | HNF1B<br>$P=1e-66$     |
|                  |  | KLF5<br>$P=1e-62$      |
|                  |  | AP-1 like<br>$P=1e-45$ |
|                  |  | FOXA1<br>$P=1e-45$     |
| WT opened sites  |  | AP-1<br>$P=1e-109$     |

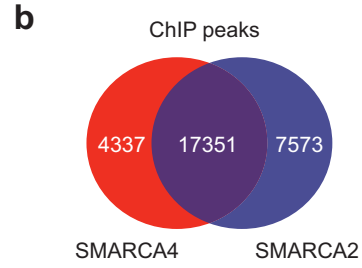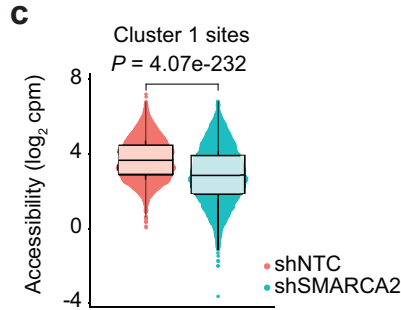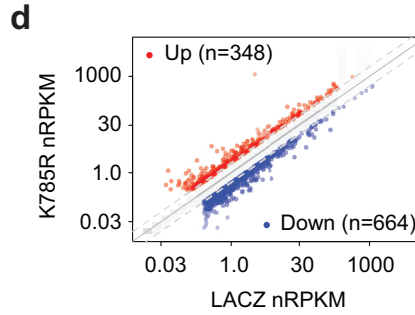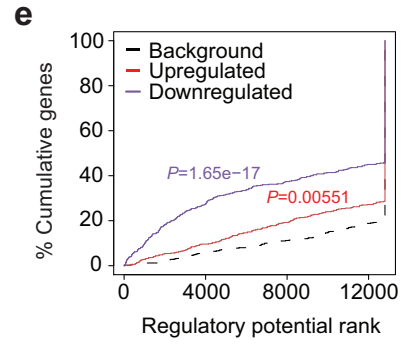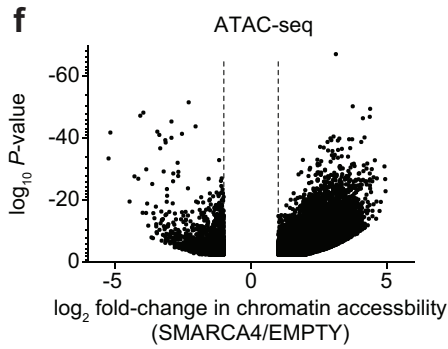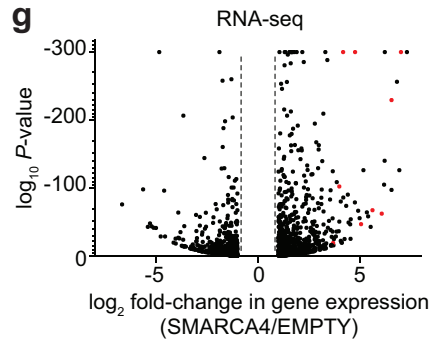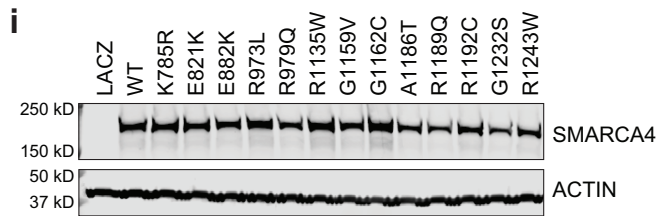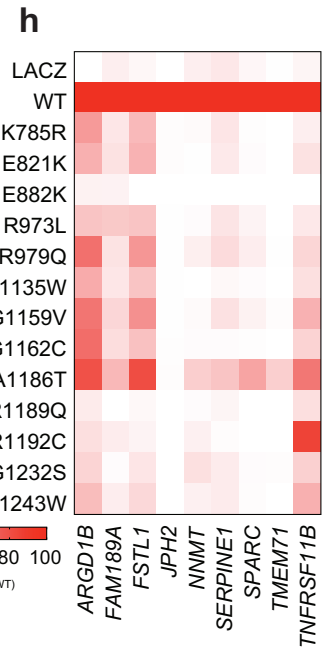

**Supplementary Figure 6. SMARCA4 mutants close a subset of SMARCA2-regulated sites and downregulate genes**

- a) Top motifs found enriched by HOMER in ATAC sites that closed after NCI-H1944 cells were transduced with SMARCA4 mutants or opened after transduced with SMARCA4 WT. A hypergeometric test (one-tailed) was used to determine  $P$  values.
- b) Overlap of SMARCA2 and SMARCA4 ChIP-seq peaks. SMARCA2 ChIP was performed in NCI-H1944 cells transduced with LACZ. SMARCA4 ChIP was performed in NCI-H1944 cells transduced with SMARCA4 WT.
- c) Violin plot of accessibility changes after SMARCA2 knockdown of sites that closed after SMARCA4 mutant expression in NCI-H1944 cells (cluster 1 in Fig. 4e). First and third quartiles are represented by the lower and upper hinges with the median represented by the line within the box; whiskers extend to 1.5 x the interquartile range. Outliers are represented as individual points. Data represented as  $\log_2$  normalized read counts per million (cpm) at  $n=3028$  sites. Significance was tested with a two-tailed Wilcoxon rank-sum test.
- d) Scatter plot of gene expression changes in NCI-H1944 cells transduced with LACZ or SMARCA4 K785R. Significance was tested with a moderated t-statistic (two-sided) and  $P$  values were adjusted for multiple testing with the Benjamini–Hochberg procedure ( $\log_2$  fold-change  $>1$ , adjusted  $P < 0.05$ ;  $n=3$  per group). Gene expression was obtained in the form of normalized Reads Per Kilobase gene model per Million total reads (nRPKM).
- e) BETA analysis graphs depicting the effect of differentially closed ATAC sites in cells from (d) ( $n=2$  per construct). Genes were ranked from high to low according to the regulatory potential of the corresponding chromatin peak. Purple lines represent K785R-downregulated genes, while red lines represent K785R-upregulated genes. A one-tailed Kolmogorov–Smirnov test was used to determine whether the up and downregulated groups differed significantly from the static group of transcriptionally unchanged genes (dashed lines).
- f) ATAC-seq changes in NCI-H1299 cells transduced with empty vector or SMARCA4 WT. Significance was tested with a moderated t-statistic (two-sided) and  $P$  values were adjusted for multiple testing with the Benjamini–Hochberg procedure ( $\log_2$  fold-change  $\geq 1$ , adjusted  $P < 0.05$ ;  $n=3$  per group).
- g) Volcano plot of gene expression changes in cells from (f). Significance was tested with a moderated t-statistic (two-sided) and  $P$  values were adjusted for multiple testing with the Benjamini–Hochberg procedure ( $\log_2$  fold-change  $>1$ , adjusted  $P < 0.05$ ;  $n=3$  per group). Red dots indicate genes that increased expression, had increased accessibility changes and tested in (h).

- h) Heatmap of qRT-PCR analysis of a subset of SMARCA4 WT-induced genes (red dots indicated in g) in NCI-H1299 transduced with SMARCA4 WT or mutants (mean of n=2 biologically independent samples).
- i) Immunoblot of cells from (h) (representative of 2 replicates).  
Source data are provided as a Source Data file.

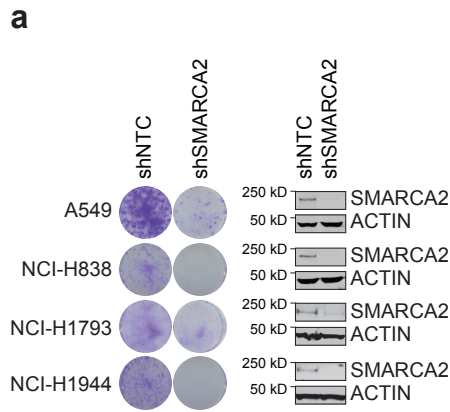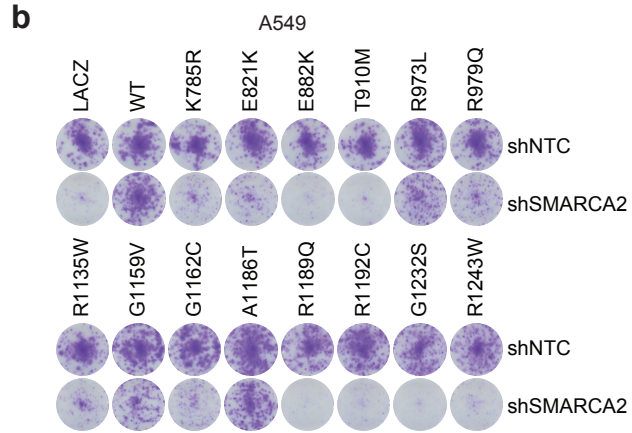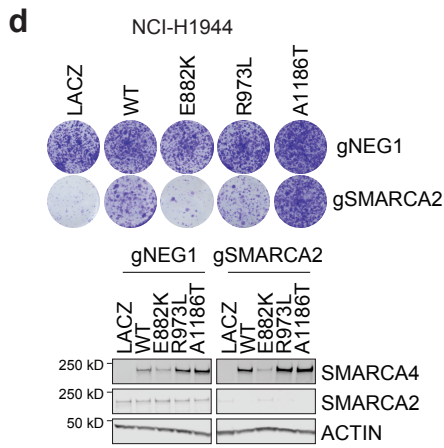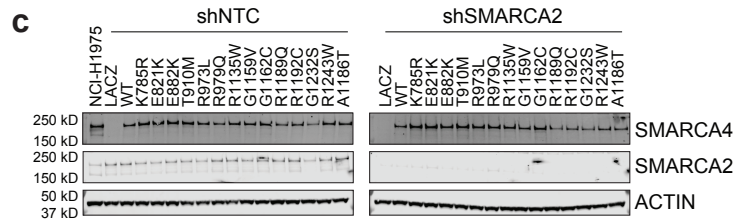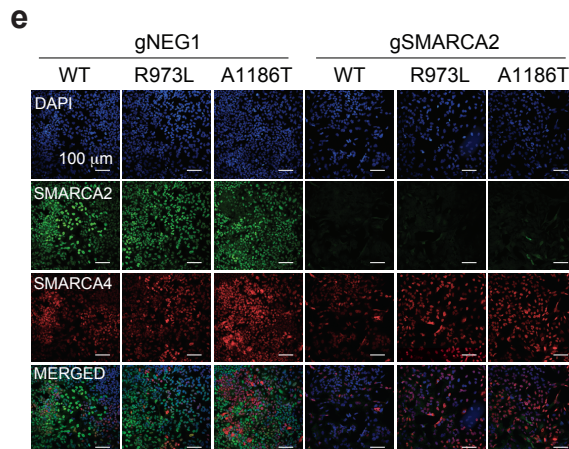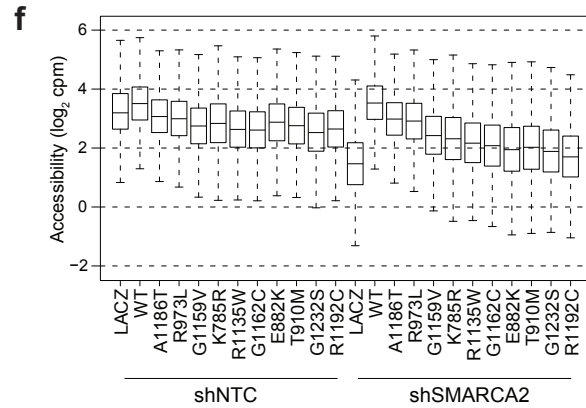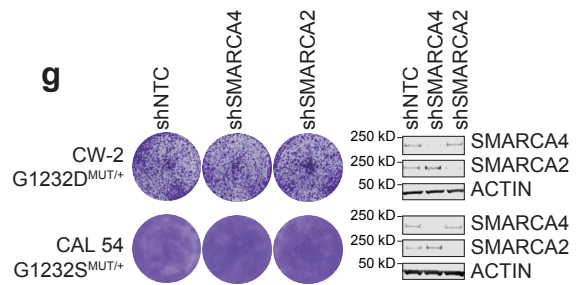

**Supplementary Figure 7. Cell viability and accessibility changes after *SMARCA2* knockdown in lung cancer cells**

- a) Long term clonogenic growth of lung cancer cell lines harboring homozygous *SMARCA4* truncating mutations after *SMARCA2* knockdown (representative of at least 3 replicates).
- b) Long term clonogenic growth of A549 cells transduced with *SMARCA4* WT or mutants after *SMARCA2* knockdown (representative of at least 3 replicates).
- c) Immunoblot of cells from (b) (representative of at least 3 replicates).
- d) Long term growth (top) and immunoblot (bottom) of NCI-H1944 cells transfected with negative control (gNEG1) or *SMARCA2*-targeting CRISPR/Cas9 ribonucleoprotein complexes after reconstitution with *SMARCA4* WT or mutants (representative of 2 replicates).
- e) Immunofluorescence of cells from (d) that grew out after CRISPR/Cas9-mediated knockout of *SMARCA2* (representative of 2 replicates).
- f) Box plots of accessibility at sites lost after *SMARCA2* knockdown in NCI-H1944 cells transduced with *SMARCA4* WT or mutants after *SMARCA2* knockdown. First and third quartiles are represented by the lower and upper hinges with the median represented by the line within the box; whiskers extend to 1.5 x the interquartile range. Data represented as  $\log_2$  normalized read counts per million (cpm) at n=7939 sites.
- g) Long term growth of CW-2 and CAL 54, which all harbor heterozygous *SMARCA4* missense mutations, after knockdown of *SMARCA2* or *SMARCA4* (left). Immunoblot confirming *SMARCA2*/*SMARCA4* protein depletion (right). Representative of two replicates.  
Source data are provided as a Source Data file.
