# Supplementary material for: Functional characterization of SMARCA4 variants identified by targeted exome-sequencing of 131,668 cancer patients
Source: PubMed Central journal article supplement (PMC7609548; doi:10.1038/s41467-020-19402-8), 2020-11-03
Supplement: 41467_2020_19402_MOESM8_ESM.pdf [file 41467_2020_19402_MOESM8_ESM.pdf]

## Reporting Summary

Nature Research wishes to improve the reproducibility of the work that we publish. This form provides structure for consistency and transparency in reporting. For further information on Nature Research policies, see [Authors & Referees](#) and the [Editorial Policy Checklist](#).

### Statistics

For all statistical analyses, confirm that the following items are present in the figure legend, table legend, main text, or Methods section.

n/a Confirmed

- |                                     |                                     |                                                                                                                                                                                                                                                            |
|-------------------------------------|-------------------------------------|------------------------------------------------------------------------------------------------------------------------------------------------------------------------------------------------------------------------------------------------------------|
| <input type="checkbox"/>            | <input checked="" type="checkbox"/> | The exact sample size ( $n$ ) for each experimental group/condition, given as a discrete number and unit of measurement                                                                                                                                    |
| <input checked="" type="checkbox"/> | <input type="checkbox"/>            | A statement on whether measurements were taken from distinct samples or whether the same sample was measured repeatedly                                                                                                                                    |
| <input type="checkbox"/>            | <input checked="" type="checkbox"/> | The statistical test(s) used AND whether they are one- or two-sided<br><i>Only common tests should be described solely by name; describe more complex techniques in the Methods section.</i>                                                               |
| <input checked="" type="checkbox"/> | <input type="checkbox"/>            | A description of all covariates tested                                                                                                                                                                                                                     |
| <input type="checkbox"/>            | <input checked="" type="checkbox"/> | A description of any assumptions or corrections, such as tests of normality and adjustment for multiple comparisons                                                                                                                                        |
| <input type="checkbox"/>            | <input checked="" type="checkbox"/> | A full description of the statistical parameters including central tendency (e.g. means) or other basic estimates (e.g. regression coefficient) AND variation (e.g. standard deviation) or associated estimates of uncertainty (e.g. confidence intervals) |
| <input type="checkbox"/>            | <input checked="" type="checkbox"/> | For null hypothesis testing, the test statistic (e.g. $F$ , $t$ , $r$ ) with confidence intervals, effect sizes, degrees of freedom and $P$ value noted<br><i>Give <math>P</math> values as exact values whenever suitable.</i>                            |
| <input checked="" type="checkbox"/> | <input type="checkbox"/>            | For Bayesian analysis, information on the choice of priors and Markov chain Monte Carlo settings                                                                                                                                                           |
| <input type="checkbox"/>            | <input checked="" type="checkbox"/> | For hierarchical and complex designs, identification of the appropriate level for tests and full reporting of outcomes                                                                                                                                     |
| <input type="checkbox"/>            | <input checked="" type="checkbox"/> | Estimates of effect sizes (e.g. Cohen's $d$ , Pearson's $r$ ), indicating how they were calculated                                                                                                                                                         |

*Our web collection on [statistics for biologists](#) contains articles on many of the points above.*

### Software and code

Policy information about [availability of computer code](#)

#### Data collection

Immunoblot: Image Studio version 3.1  
 FRET: Tecan i-control software common version 3.7.3.0  
 qPCR/qChIP: Applied Biosystems FLEX  
 Cell confluence: Incucyte  
 Gel shift: Typhoon  
 IF: Opera Phenix  
 NGS: Illumina NextSeq 500 and HiSeq4000

#### Data analysis

R version 3.5.1  
 GSNAP version 2013-10-10; <http://research-pub.gene.com/gmap/>  
 MACS2 version 2.1.0  
 Limma R package version 3.38.3  
 HTSeqGenie R package version 4.12.0  
 HOMER version 4.7  
 BETA version 1.0.7  
 Prism 8 version 8.3.0  
 Pymol version 2.0  
 Clustal Omega version 1.2.2

For manuscripts utilizing custom algorithms or software that are central to the research but not yet described in published literature, software must be made available to editors/reviewers. We strongly encourage code deposition in a community repository (e.g. GitHub). See the Nature Research [guidelines for submitting code & software](#) for further information.

## Data

Policy information about [availability of data](#)

All manuscripts must include a [data availability statement](#). This statement should provide the following information, where applicable:

- Accession codes, unique identifiers, or web links for publicly available datasets
- A list of figures that have associated raw data
- A description of any restrictions on data availability

All ATAC/ChIP/RNA-seq data that support the findings of this study have been deposited in the Gene Expression Omnibus (GEO) with accession code "GSE144844" [<https://www.ncbi.nlm.nih.gov/geo/query/acc.cgi?acc=GSE144844>]. Full variant information for ~18,000 samples have been deposited in the Genomics Data Commons (GDC) with study accession "phs001179" [<https://gdc.cancer.gov/about-gdc/contributed-genomic-data-cancer-research/foundation-medicine/foundation-medicine>]. In an effort to minimize any risk of re-identification of individuals with respect to the Health Insurance Portability and Accountability Act, additional detailed data will not be provided. However, all SMARCA4 variants described in this study are found in Supplementary Data 1. Source data for Figures 4a, 4f, 4g and Supplementary Figures 5b, 6h are provided with this paper. The remaining data are available within the Article, Supplementary Information or available from the authors upon request.

## Field-specific reporting

Please select the one below that is the best fit for your research. If you are not sure, read the appropriate sections before making your selection.

- Life sciences       Behavioural & social sciences       Ecological, evolutionary & environmental sciences

For a reference copy of the document with all sections, see [nature.com/documents/nr-reporting-summary-flat.pdf](https://www.nature.com/documents/nr-reporting-summary-flat.pdf)

## Life sciences study design

All studies must disclose on these points even when the disclosure is negative.

|                 |                                                                                                                                                                                                                                                                                                                                                                                                                                                                                                                                                                                                                                                                                                                                                                                                                                                                                                                                                                                                                                                                             |
|-----------------|-----------------------------------------------------------------------------------------------------------------------------------------------------------------------------------------------------------------------------------------------------------------------------------------------------------------------------------------------------------------------------------------------------------------------------------------------------------------------------------------------------------------------------------------------------------------------------------------------------------------------------------------------------------------------------------------------------------------------------------------------------------------------------------------------------------------------------------------------------------------------------------------------------------------------------------------------------------------------------------------------------------------------------------------------------------------------------|
| Sample size     | No sample size calculations were performed. ATAC- and ChIP-seq studies were performed in biological duplicate. RNA-seq studies were performed in biological triplicate. Other experiments were performed with two or more biological replicates as reported in the Statistics and Reproducibility section and figure legends. Samples sizes were chosen empirically in line with previous publications that performed similar techniques (Pan et al., Nature Genetics, 2019; Michel et al., Nature Cell Biology, 2018).                                                                                                                                                                                                                                                                                                                                                                                                                                                                                                                                                     |
| Data exclusions | No data exclusions were performed.                                                                                                                                                                                                                                                                                                                                                                                                                                                                                                                                                                                                                                                                                                                                                                                                                                                                                                                                                                                                                                          |
| Replication     | FRET and gel shift assays were replicated twice, with each orthogonal method confirming the same result. SMARCA4 immunoprecipitations followed by silver stains and immunoblots were replicated at least twice. qPCR of gene induction after SMARCA4 WT- and mutant-reconstitution was replicated at least twice and confirmed in 2 different cell lines. qChIP experiments were replicated at least 3 times with similar results. Incubate confluence measurements and colony forming assays in SMARCA4 WT- and mutant-reconstituted cell lines with and without SMARCA2 knockdown were replicated at least 3 times. Colony forming assays and immunofluorescence in SMARCA4 WT- and mutant-reconstituted cells after CRISPR knockout of SMARCA2 were replicated twice. ATAC- and ChIP-seq were performed in duplicate; RNA-seq were performed in triplicate. ChIP- and RNA-seq was validated in a panel of genes using qChIP and qPCR experiments. ATAC-seq and RNA-seq after SMARCA4 WT reconstitution was performed in 2 different cell lines, showing similar results. |
| Randomization   | Randomization was not relevant to this study as all experiments were performed with molecular/cell biology techniques in cell lines where the experimenter designs and performs the experimental conditions so randomization between conditions is not possible.                                                                                                                                                                                                                                                                                                                                                                                                                                                                                                                                                                                                                                                                                                                                                                                                            |
| Blinding        | Blinding was not relevant to this study as experiments were performed with molecular/cell biology techniques in cell lines where the experimenter designs and performs the experimental conditions so blinding is not possible.                                                                                                                                                                                                                                                                                                                                                                                                                                                                                                                                                                                                                                                                                                                                                                                                                                             |

## Reporting for specific materials, systems and methods

We require information from authors about some types of materials, experimental systems and methods used in many studies. Here, indicate whether each material, system or method listed is relevant to your study. If you are not sure if a list item applies to your research, read the appropriate section before selecting a response.

### Materials & experimental systems

| n/a                                 | Involved in the study                                           |
|-------------------------------------|-----------------------------------------------------------------|
| <input type="checkbox"/>            | <input checked="" type="checkbox"/> Antibodies                  |
| <input type="checkbox"/>            | <input checked="" type="checkbox"/> Eukaryotic cell lines       |
| <input checked="" type="checkbox"/> | <input type="checkbox"/> Palaeontology                          |
| <input checked="" type="checkbox"/> | <input type="checkbox"/> Animals and other organisms            |
| <input type="checkbox"/>            | <input checked="" type="checkbox"/> Human research participants |
| <input checked="" type="checkbox"/> | <input type="checkbox"/> Clinical data                          |

### Methods

| n/a                                 | Involved in the study                           |
|-------------------------------------|-------------------------------------------------|
| <input type="checkbox"/>            | <input checked="" type="checkbox"/> ChIP-seq    |
| <input checked="" type="checkbox"/> | <input type="checkbox"/> Flow cytometry         |
| <input checked="" type="checkbox"/> | <input type="checkbox"/> MRI-based neuroimaging |

## Antibodies

### Antibodies used

Immunoblot: Primary (1:1000 antibody dilutions): SMARCA4/BRG1 (Abcam ab110641); SMARCA2/BRM (Cell Signaling Technologies, 11966); SMARCC1/BAF155 (Cell Signaling Technologies, 11956S); SMARCC2/BAF170 (Bethyl, A301-039A); BAF47/SNF5 (Cell Signaling Technologies, 91735); SMARCD1/BAF60A (Bethyl, A301-595A); SMARCE1/BAF57 (Bethyl, A300-810A); ACTL6A/BAF53A (Bethyl, A301-391A); ARID1A/BAF250A (Cell Signaling Technologies, 12354); ARID1B/BAF250B (Bethyl, A301-047A); SS18 (Cell Signaling Technologies, 21792), DPF2 (Abcam, ab134942); PBRM1/BAF180 (Millipore, ABE370); ARID2 (Santa Cruz, E-3); ARID2 (Bethyl, A302-230A); BRD7 (Cell Signaling Technologies, 15125); PHF10 (Abcam, ab154637); BRD9 (Abcam, ab137245); GLTSCR1 (Invitrogen, PA5-63267); GLTSCR1L (Novus, NBP1-86359); ACTIN (Cell Signaling Technologies, 3700), TUBULIN (Cell Signaling Technologies, 2148), HDAC1 (Cell Signaling Technologies, 34589), LAMIN A/C (Cell Signaling Technologies, 4777), FLAG (Sigma, M2). Secondary (1:1000 antibody dilution): goat anti-mouse IgG conjugated to IRDye 680RD (Licor, 926-68070); goat anti-rabbit IgG conjugated to IRDye 800CW (Licor, 926-65010).

Immunofluorescence: Primary antibodies: SMARCA2 (1:2000, Cell Signaling Technologies, 11966); SMARCA4 (1:500, Santa Cruz, G-7). Secondary antibodies (1:1000): goat anti-rabbit IgG F(ab')<sub>2</sub> fragment conjugated with Alexa Fluor 488 (Cell Signaling Technologies, 4412) and goat anti-mouse IgG F(ab')<sub>2</sub> fragment conjugated with Alexa Fluor 647 (Cell Signaling Technologies, 4410).

qChIP: SMARCA4 antibody (4uL/30ug chromatin, Abcam, ab110641).

ChIP-seq: SMARCA2 (5uL/30ug chromatin, Abcam, ab15597); SMARCA4 antibody (10uL/30ug chromatin, Abcam, ab110641).

### Validation

The primary antibodies for ACTIN (cat no. 3700), TUBULIN (cat. no 2148), HDAC1 (cat no. 34589), LAMIN A/C (cat no. 4777) have been validated for the detection of human proteins by immunoblot, and validation data are available on the Cell Signaling Technology website. The primary antibody for FLAG (M2) has been validated for the immunoprecipitation and detection of FLAG-tagged proteins by immunoblot, and validation data are available on the Sigma website. The SMARCA4 (G-7) and SMARCA2 (cat no. 11966) primary antibodies have been validated for use in immunofluorescence in human cells, and validation data are available on the Santa Cruz and Cell Signaling Technology websites, respectively. The SMARCA4 (ab110641) and SMARCA2 (ab15597) antibodies have been validated for use in ChIP of human cells, and validation data are available on the Abcam website. Primary antibodies for other BAF subunits were chosen based on previous publications that also validated their specificity and application (Pan et al., Nature Genetics, 2019; Michel et al., Nature Cell Biology, 2018).

## Eukaryotic cell lines

### Policy information about [cell lines](#)

#### Cell line source(s)

A549, NCI-H838, NCI-H1299, NCI-H1435, NCI-H1793, NCI-H1944 and NCI-H1975 cells were obtained from ATCC. CW-2 cells were obtained from the Riken Institute. HCC1897 cells were obtained from University of Texas Southwestern Medical Center. CAL 54 and CAL-12T cells were obtained from DSMZ. Lenti-X 293T cells were obtained from Takara Bio.

#### Authentication

A549, NCI-H838, NCI-H1299, NCI-H1435, NCI-H1793, NCI-H1944, NCI-H1975, CW-2, HCC1897, CAL 54 and CAL-12T cell lines were authenticated using SNP genotyping and STR profiling by the Genentech internal cell line repository, gCell. Lenti-X 293T cells were not authenticated after being purchased from Takara Bio.

#### Mycoplasma contamination

All cell lines tested negative for mycoplasma.

#### Commonly misidentified lines (See [ICLAC](#) register)

No commonly misidentified cell lines were used in this study.

## Human research participants

### Policy information about [studies involving human research participants](#)

#### Population characteristics

The samples represent an adult (>18) 'all comers' pan-solid tumor cohort of patients profiled through Dec 2017 in the FoundationCORE database. Patients were 56% female, 44% male with a median age of 62 (inter-quartile range of 53-70). There is limited demographic data in the FoundationCORE database.

#### Recruitment

The samples used in this study were not specifically selected and represent an 'all comers' patient population to Foundation Medicine genomic profiling (pan-solid tumors and pan-center). The pathologic diagnosis of each case was confirmed by review of hematoxylin and eosin stained slides, and all samples that advanced to nucleic acid extraction contained a minimum of 20% tumor cells.

#### Ethics oversight

Approval was obtained from the Western Institutional Review Board (Protocol No. 20152817). Patients consented for the use of their data for analysis but not for raw data release.

Note that full information on the approval of the study protocol must also be provided in the manuscript.

## ChIP-seq

## Data deposition

Confirm that both raw and final processed data have been deposited in a public database such as [GEO](#).

Confirm that you have deposited or provided access to graph files (e.g. BED files) for the called peaks.

## Data access links

*May remain private before publication.*

To review GEO accession GSE144844:  
Go to <https://www.ncbi.nlm.nih.gov/geo/query/acc.cgi?acc=GSE144844>  
GSE147201 is the ChIP-seq SubSeries of the GSE144844 SuperSeries (which contains also ATAC-seq and RNA-seq).

## Files in database submission

fastqs, bigWigs, peak files

## Genome browser session

(e.g. [UCSC](#))

No longer applicable

## Methodology

## Replicates

2 replicates per ChIP sample

## Sequencing depth

| Sample name                    | Total reads | High quality mapped reads | Uniquely mapped |
|--------------------------------|-------------|---------------------------|-----------------|
| H1944-LACZ-NoDOX_SMARCA2_R1    | 44006980    | 42043070                  | 34055648        |
| H1944-LACZ-NoDOX_SMARCA2_R2    | 41274196    | 39557369                  | 31730014        |
| H1944-LACZ-NoDOX_SMARCA4_R1    | 38055184    | 36324563                  | 26988090        |
| H1944-LACZ-NoDOX_SMARCA4_R2    | 34702219    | 32889633                  | 24252324        |
| H1944-SMARCA4-NoDOX_SMARCA4_R1 | 44317965    | 42354735                  | 33809081        |
| H1944-SMARCA4-NoDOX_SMARCA4_R2 | 44129357    | 42237556                  | 33921593        |
| H1944-SMARCA4-DOX_SMARCA4_R1   | 32712293    | 31260566                  | 25489385        |
| H1944-SMARCA4-DOX_SMARCA4_R2   | 36183765    | 34711339                  | 28707115        |
| H1944-LACZ-NoDOX_Input         | 44865086    | 42961388                  | 36444735        |
| H1944-SMARCA4-NoDOX_Input      | 32617062    | 31202484                  | 26475195        |
| H1944-SMARCA4-DOX_Input        | 33255753    | 31744677                  | 27043051        |

All reads were 75 bp single-end.

## Antibodies

SMARCA2 (5uL/30ug chromatin, Abcam, ab15597 lot GR3180556-1); SMARCA4 antibody (10uL/30ug chromatin, Abcam, ab110641, lot GR3208604-7).

## Peak calling parameters

Sequencing reads were aligned to the human reference genome (NCBI Build 38) using GSNAP37 version '2013-10-10', allowing a maximum of two mismatches per read sequence (parameters: '-M 2 -n 10 -B 2 -i 1 --pairmax-dna=1000 --terminal-threshold=1000 --gmap-mode=none --clip-overlap'). Mapped reads then were assessed for peaks relative to the input controls using Macs2 (v.2.1.0) callpeak function.

## Macs commands:

```
macs2 callpeak -t H1944-LACZ-NoDOX_SMARCA2_R1.bam -c H1944-LACZ-NoDOX_Input.bam -f BAM -g 2.7e9 -n H1944-LACZ-NoDOX_SMARCA2_R1 --outdir macs_output
macs2 callpeak -t H1944-LACZ-NoDOX_SMARCA2_R2.bam -c H1944-LACZ-NoDOX_Input.bam -f BAM -g 2.7e9 -n H1944-LACZ-NoDOX_SMARCA2_R2 --outdir macs_output
macs2 callpeak -t H1944-LACZ-NoDOX_SMARCA4_R1.bam -c H1944-LACZ-NoDOX_Input.bam -f BAM -g 2.7e9 -n H1944-LACZ-NoDOX_SMARCA4_R1 --outdir macs_output
macs2 callpeak -t H1944-LACZ-NoDOX_SMARCA4_R2.bam -c H1944-LACZ-NoDOX_Input.bam -f BAM -g 2.7e9 -n H1944-LACZ-NoDOX_SMARCA4_R2 --outdir macs_output
macs2 callpeak -t H1944-SMARCA4-NoDOX_SMARCA4_R1.bam -c H1944-SMARCA4-NoDOX_Input.bam -f BAM -g 2.7e9 -n H1944-SMARCA4-NoDOX_SMARCA4_R1 --outdir macs_output
macs2 callpeak -t H1944-SMARCA4-NoDOX_SMARCA4_R2.bam -c H1944-SMARCA4-NoDOX_Input.bam -f BAM -g 2.7e9 -n H1944-SMARCA4-NoDOX_SMARCA4_R2 --outdir macs_output
macs2 callpeak -t H1944-SMARCA4-DOX_SMARCA4_R1.bam -c H1944-SMARCA4-DOX_Input.bam -f BAM -g 2.7e9 -n H1944-SMARCA4-DOX_SMARCA4_R1 --outdir macs_output
macs2 callpeak -t H1944-SMARCA4-DOX_SMARCA4_R2.bam -c H1944-SMARCA4-DOX_Input.bam -f BAM -g 2.7e9 -n H1944-SMARCA4-DOX_SMARCA4_R2 --outdir macs_output
```

## Data quality

We followed Encode guidelines for data quality assessment. The target nonredundancy fraction (NRF) for all samples except H1944-LACZ\_SMARCA4\_R1 and R2 were  $\geq 0.8$  for 10 million reads. All samples except H1944-LACZ\_SMARCA4\_R1 and R2 had a fraction of reads in peaks (FRiP) greater than 1%. H1944-LACZ\_SMARCA4 samples were SMARCA4 ChIP done in H1944 cells transduced with LACZ (and therefore do not express SMARCA4 WT). Hence ChIP'd DNA is minimal in these samples

leading to slightly lower NRFs (0.74) and FRiPs (0.4/0.8%) and lower number of peaks.

Samples Number of peaks (FDR<5%; fold-enrichment =>5)

H1944-LACZ-NoDOX\_SMARCA2\_R1 37397

H1944-LACZ-NoDOX\_SMARCA2\_R2 49014

H1944-LACZ-NoDOX\_SMARCA4\_R1 132

H1944-LACZ-NoDOX\_SMARCA4\_R2 3415

H1944-SMARCA4-NoDOX\_SMARCA4\_R1 35488

H1944-SMARCA4-NoDOX\_SMARCA4\_R2 58422

H1944-SMARCA4-DOX\_SMARCA4\_R1 36157

H1944-SMARCA4-DOX\_SMARCA4\_R2 42329

## Software

Sequencing reads were aligned to the human reference genome (NCBI Build 38) using GSNAP37 version '2013-10-10', allowing a maximum of two mismatches per read sequence (parameters: '-M 2 -n 10 -B 2 -i 1 --pairmax-dna=1000 --terminal-threshold=1000 --gmap-mode=none --clip-overlap'). Mapped reads then were assessed for peaks relative to the input controls using Macs2 (v.2.1.0) callpeak function.
